# Supplementary material for: Study on the Structure-Activity Relationship of an Antimicrobial Peptide, Brevinin-2GUb, from the Skin Secretion of Hylarana guentheri
Source: MDPI journal article supplement (doi:10.3390/antibiotics10080895), 2021-07-22
Supplement: s1 [file s1]

## Supplementary Materials

Study on the Structure-activity Relationship of an Antimicrobial Peptide, Brevinin-2GUb, from the Skin Secretion of *Hylarana guntheri*

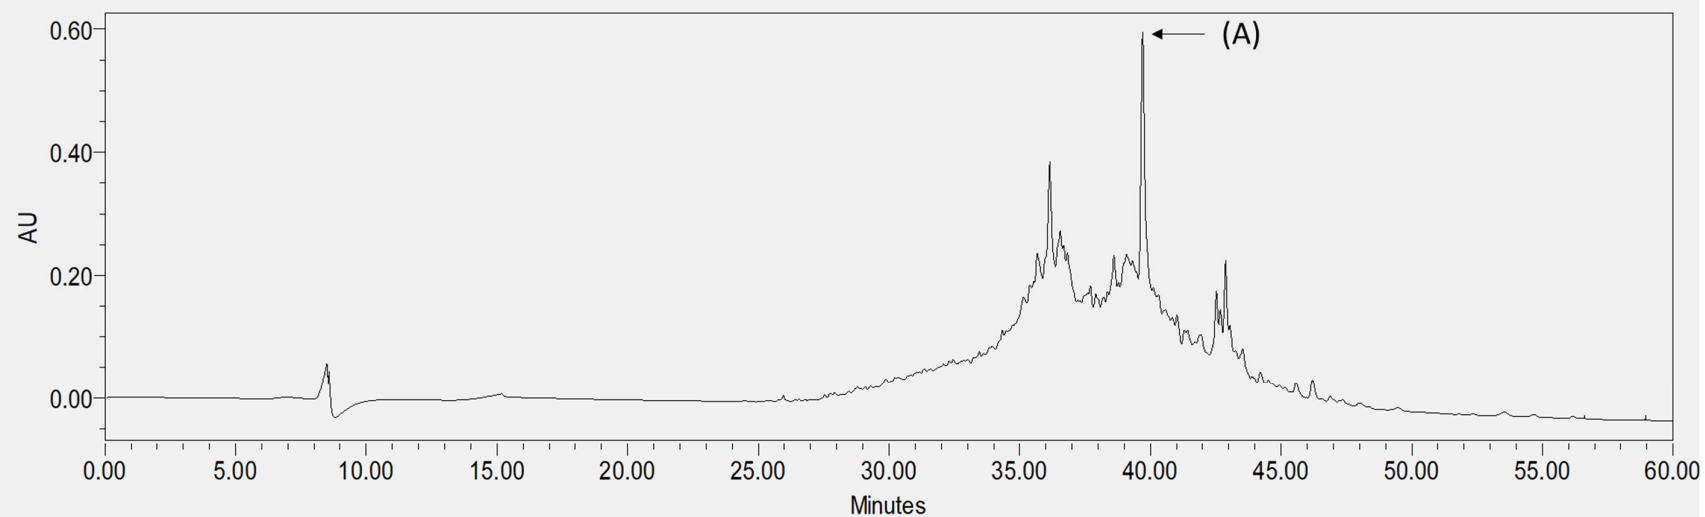

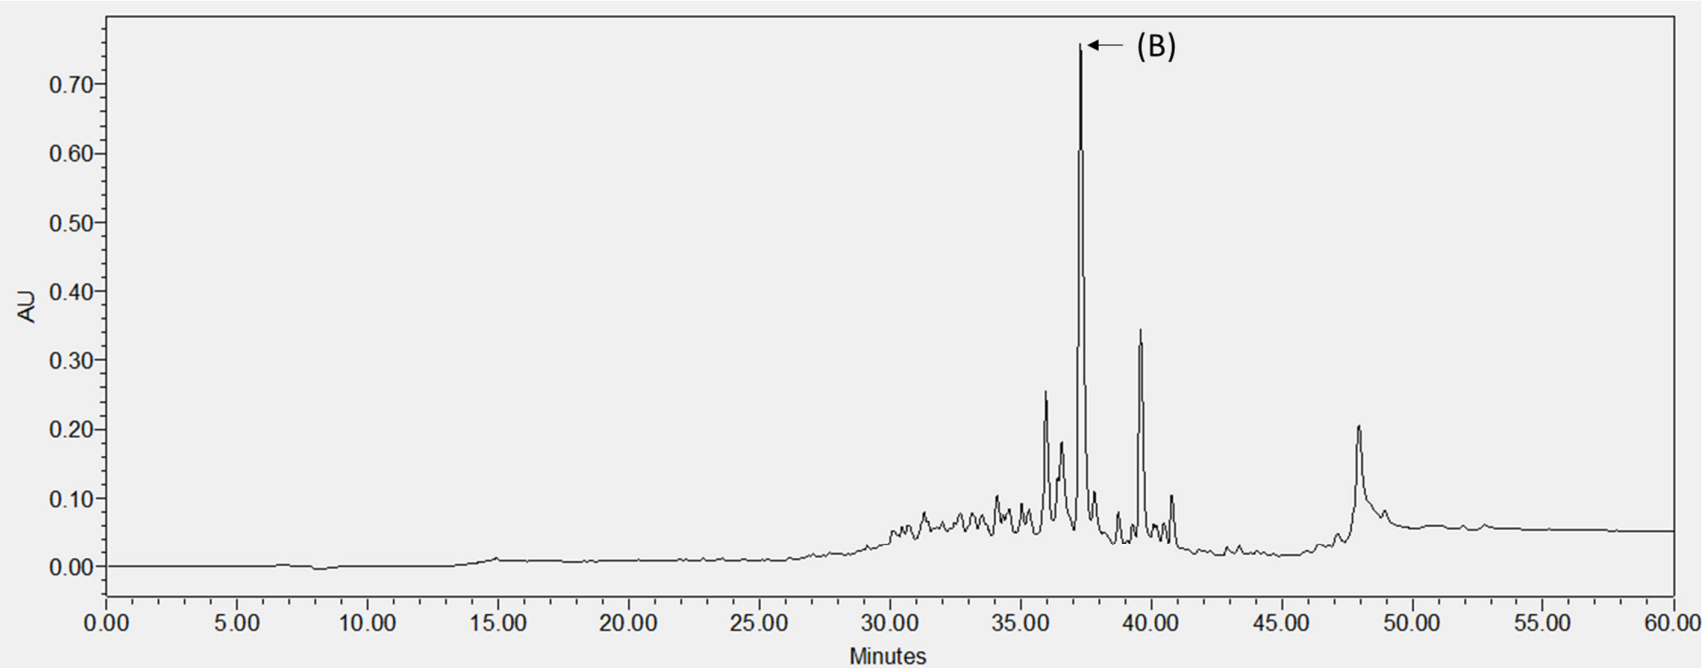

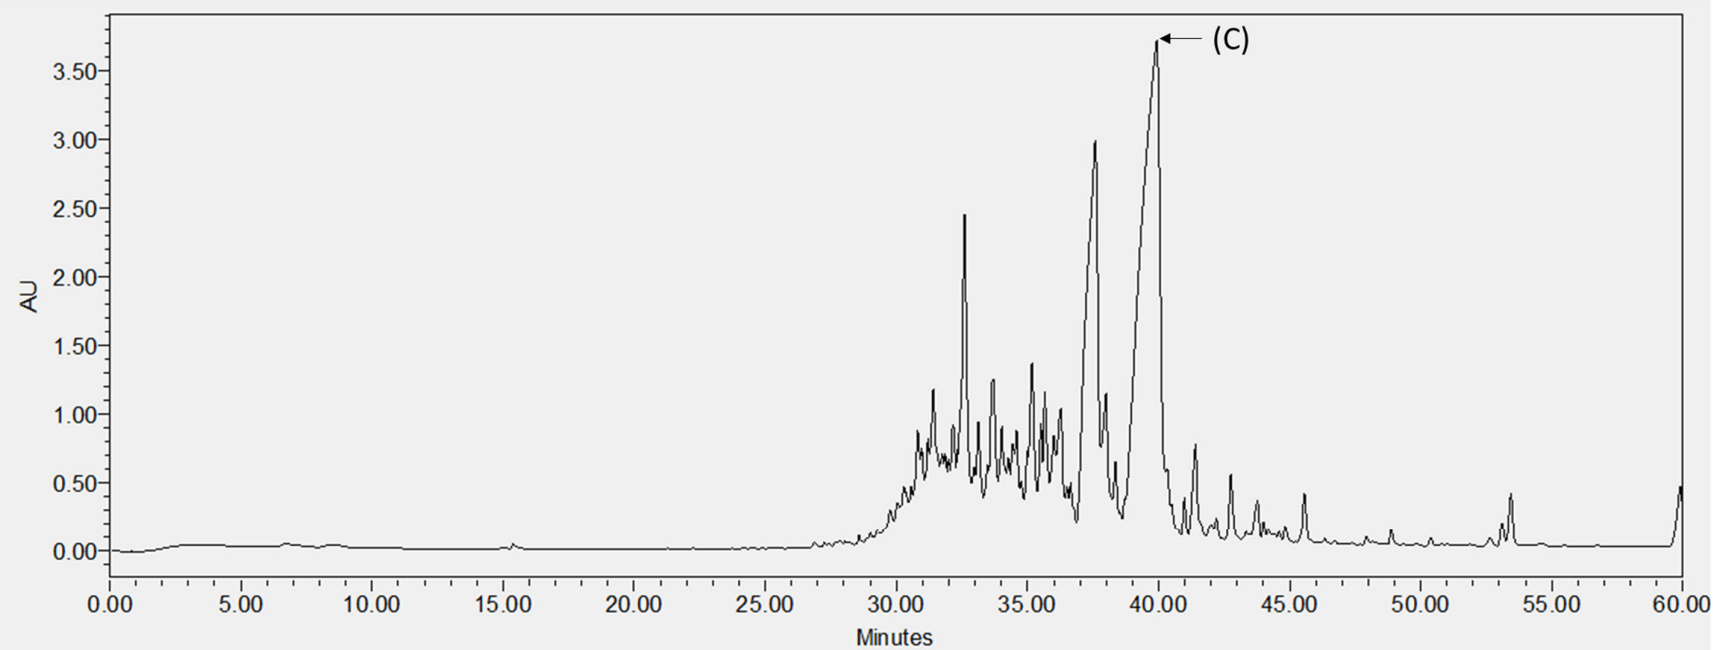

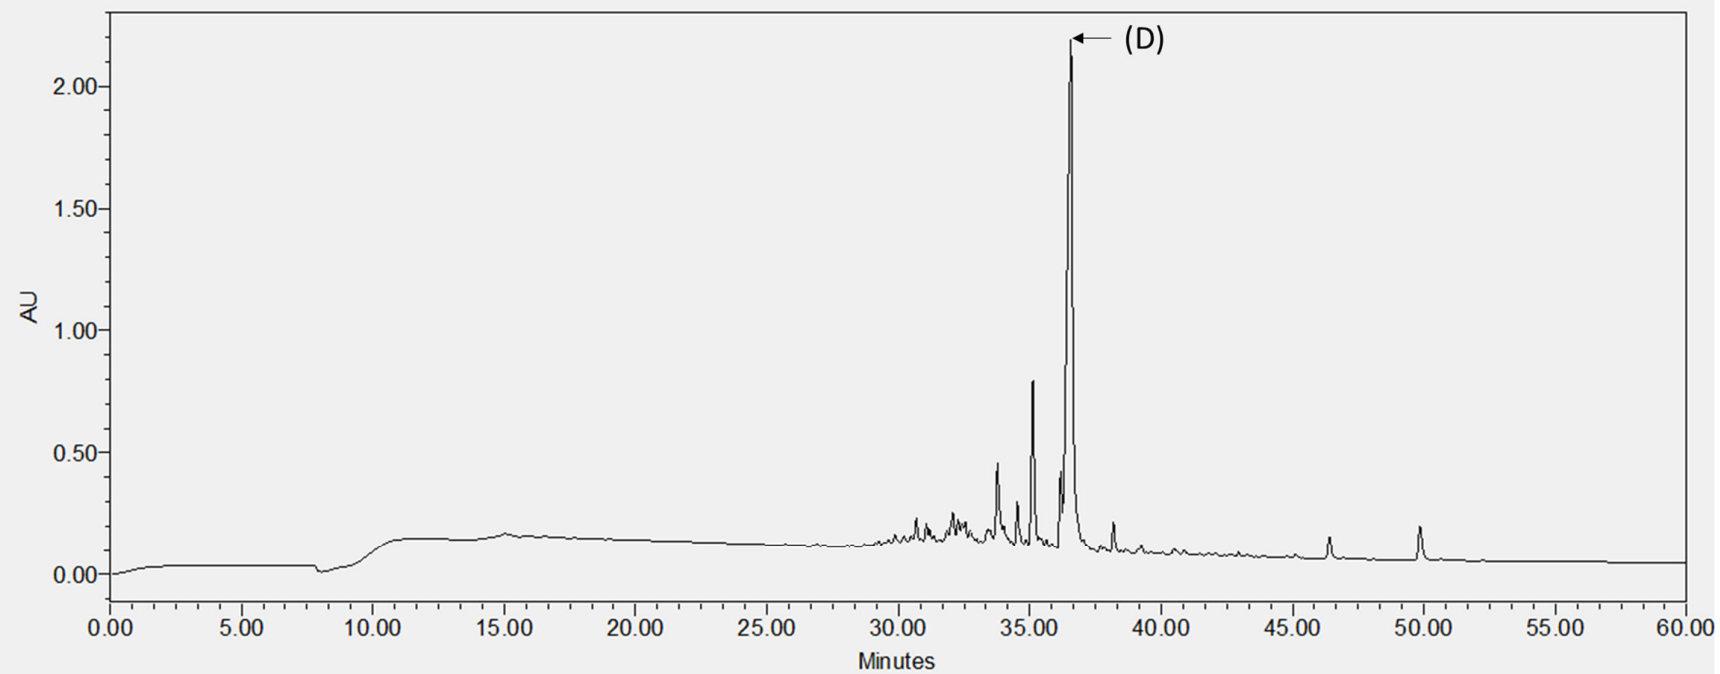

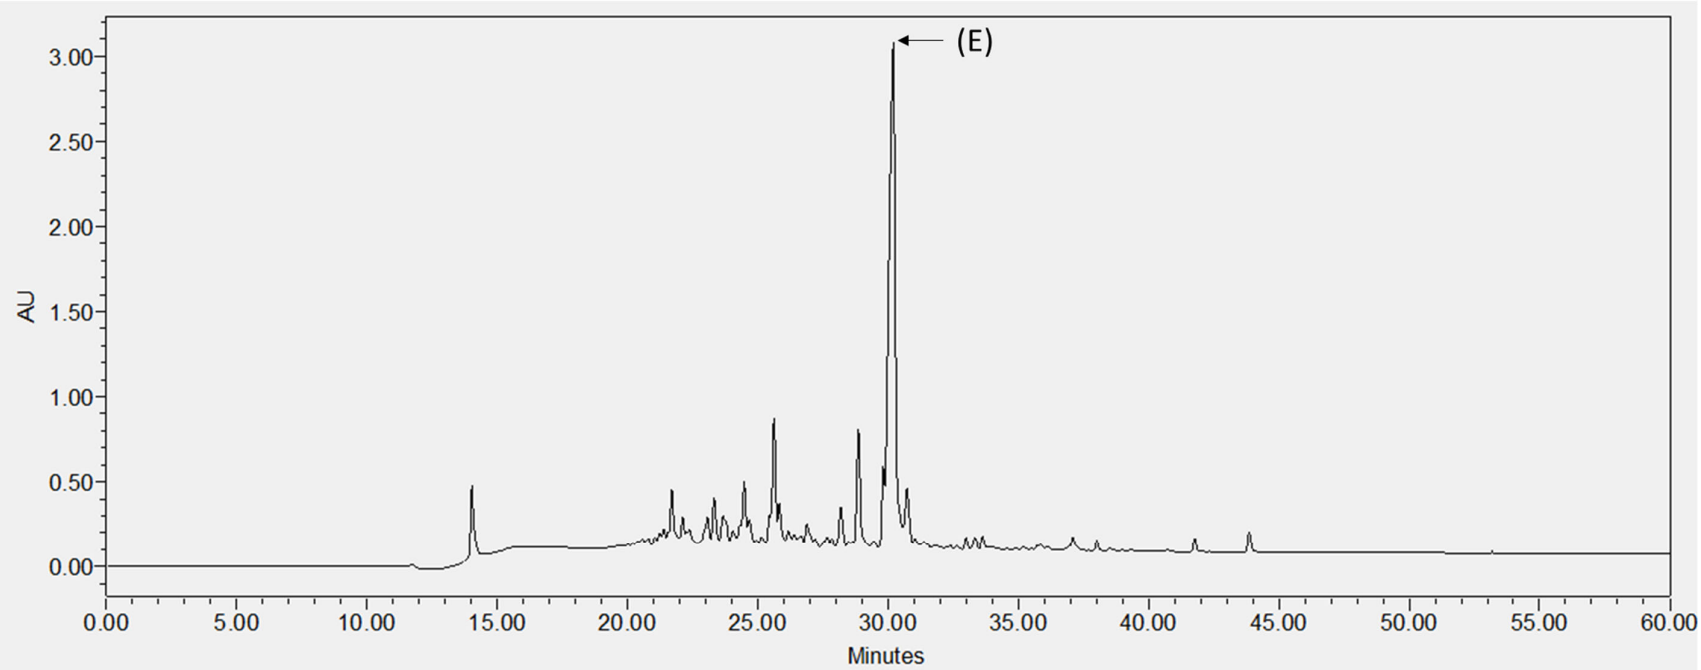

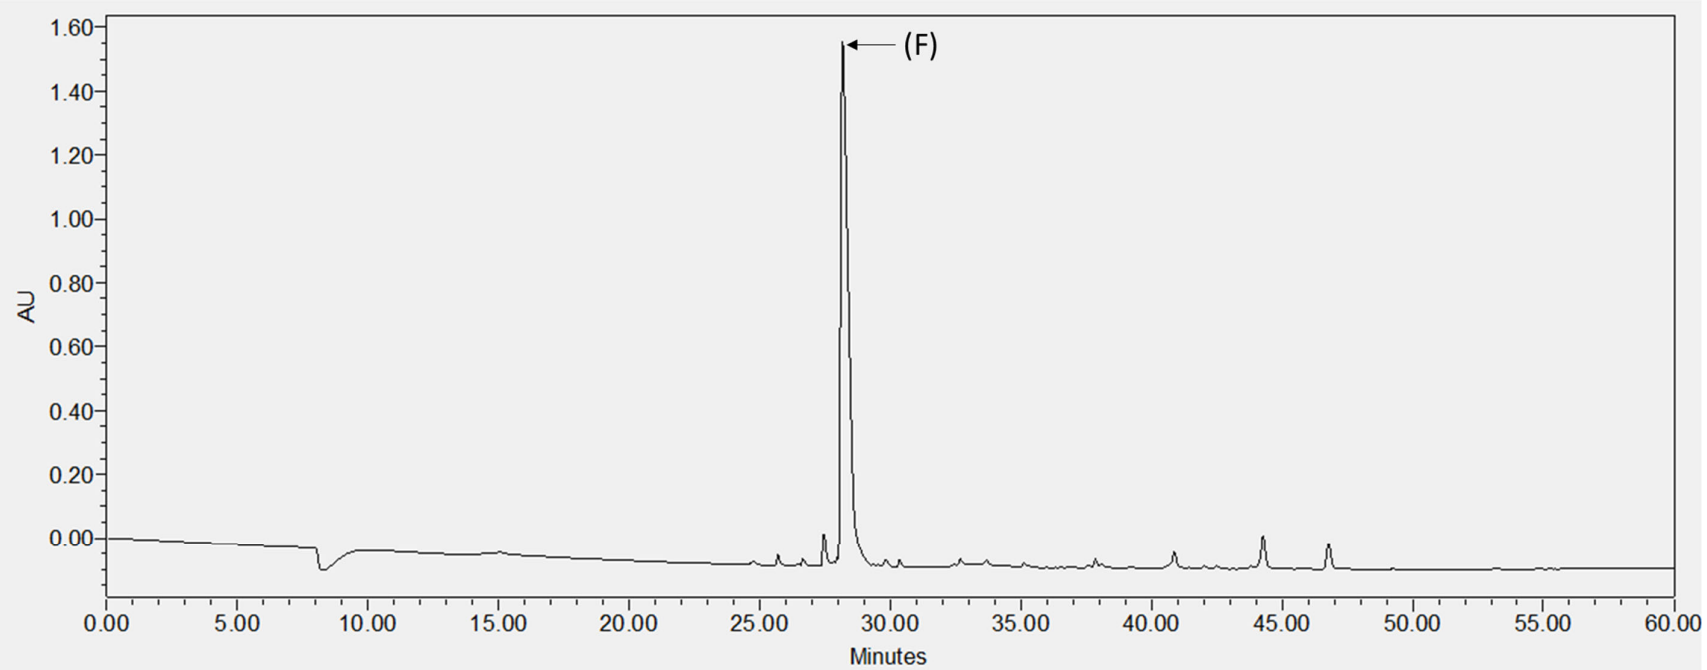

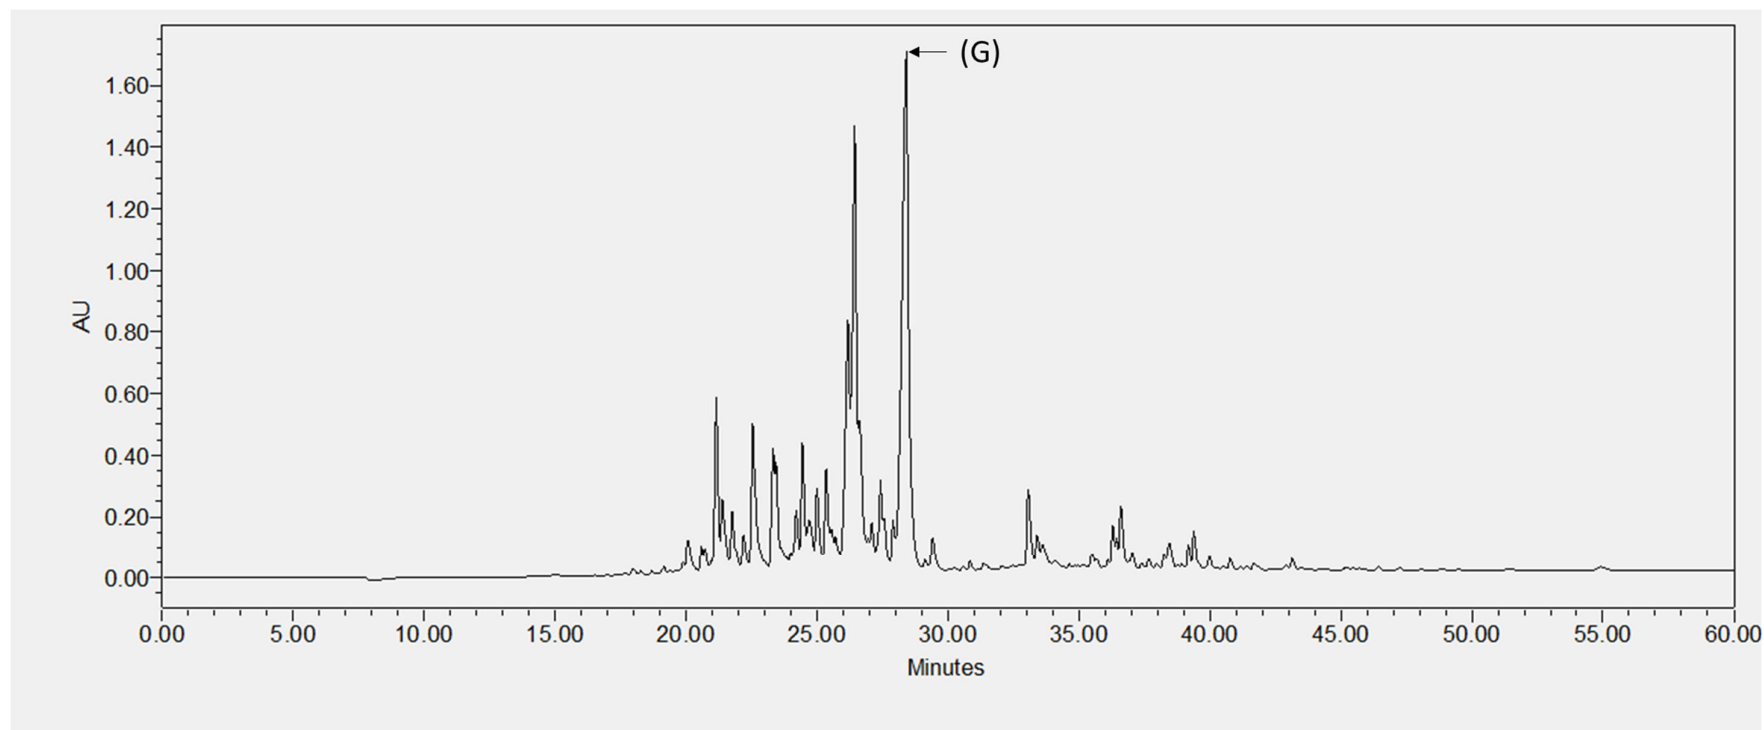

**Figure S1.** The RP-HPLC chromatograms of (A) Brevinin-2GUb, (B) tB2U, (C) tB2U- $\alpha$ , (D) tB2U-K, (E) tB2U-6K, (F) 7-tB2U-K and (G) 14-tB2U-K. The elution peak of each peptide is indicated by the arrow.

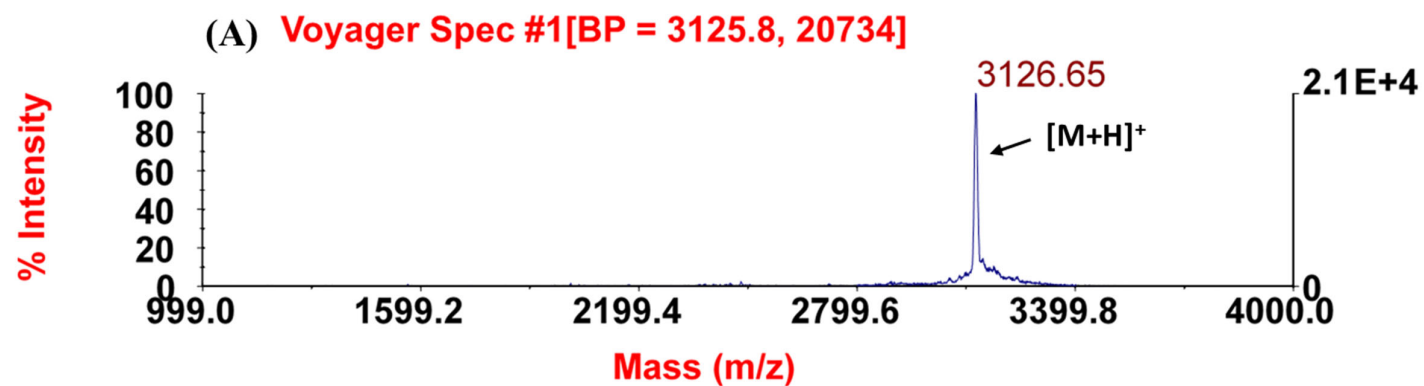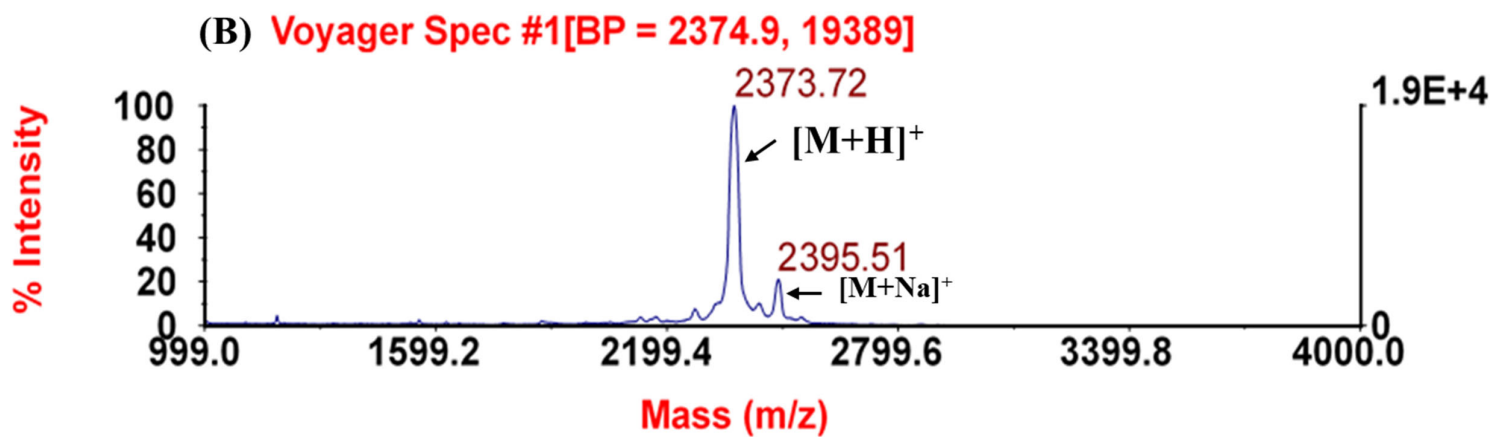



(C) Voyager Spec #1[BP = 1882.5, 18939]

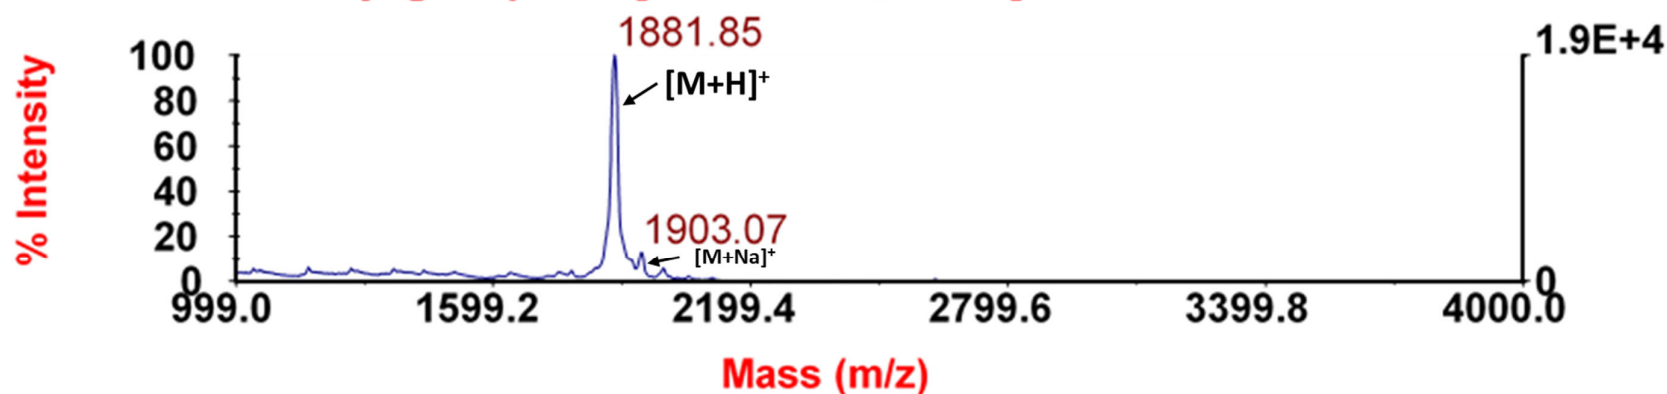

(D) Voyager Spec #1[BP = 1893.9, 14413]

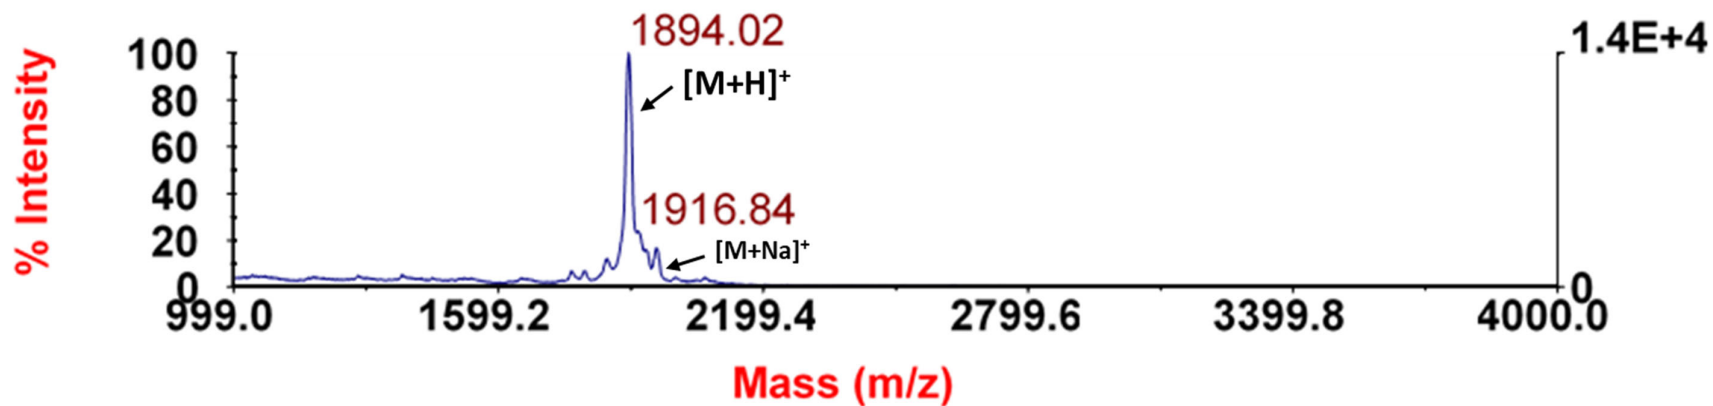

(E) Voyager Spec #1[BP = 1948.6, 50836]

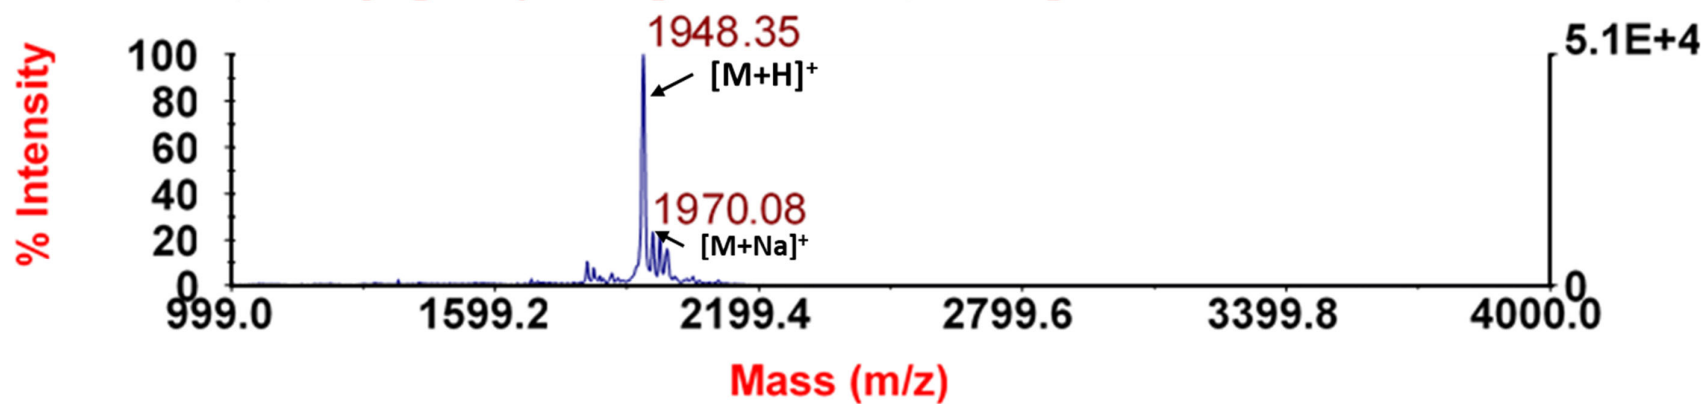

(F) Voyager Spec #1[BP = 741.2, 16860]

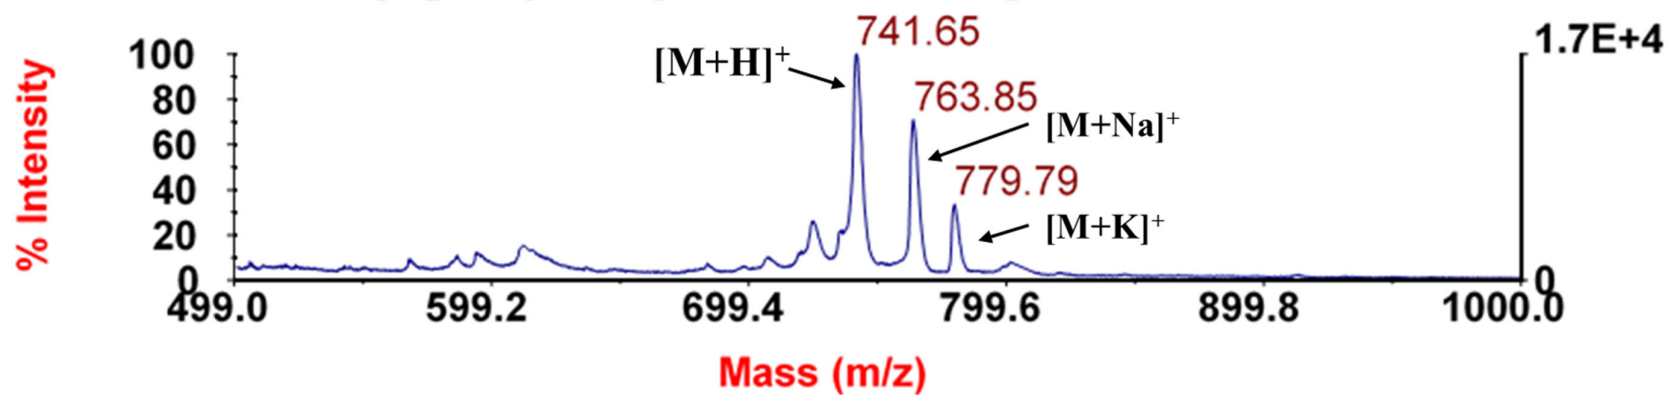

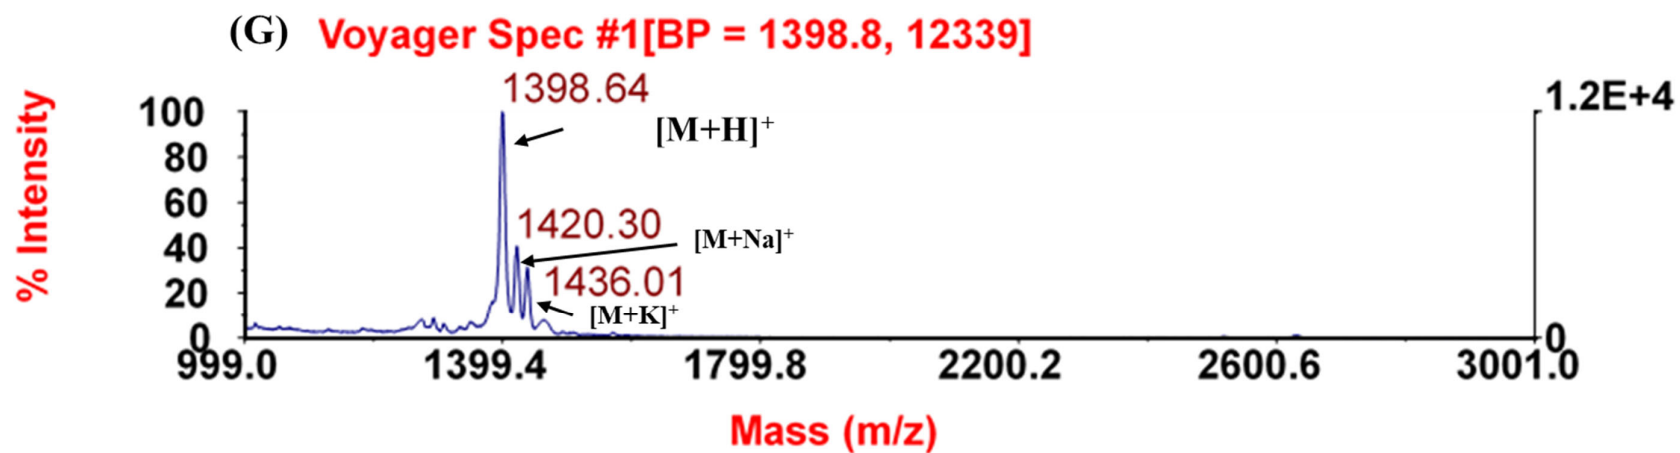

**Figure S2.** The mass spectra of (A) Brevinin-2GUb, (B) tB2U, (C) tB2U- $\alpha$ , (D) tB2U-K, (E) tB2U-6K, (F) 7-tB2U-K and (G) 14-tB2U-K obtained from MALDI-TOF MS. The observed  $[M+H]^+$  ion, the sodium and potassium adduct ions are indicated by arrows.

(A)

e522

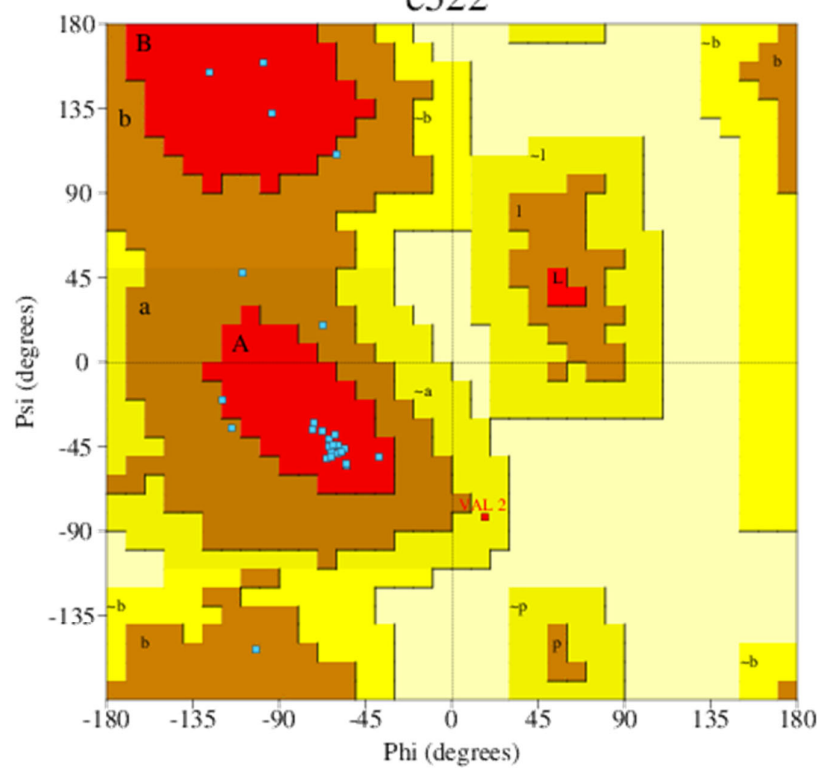

(B)

e525

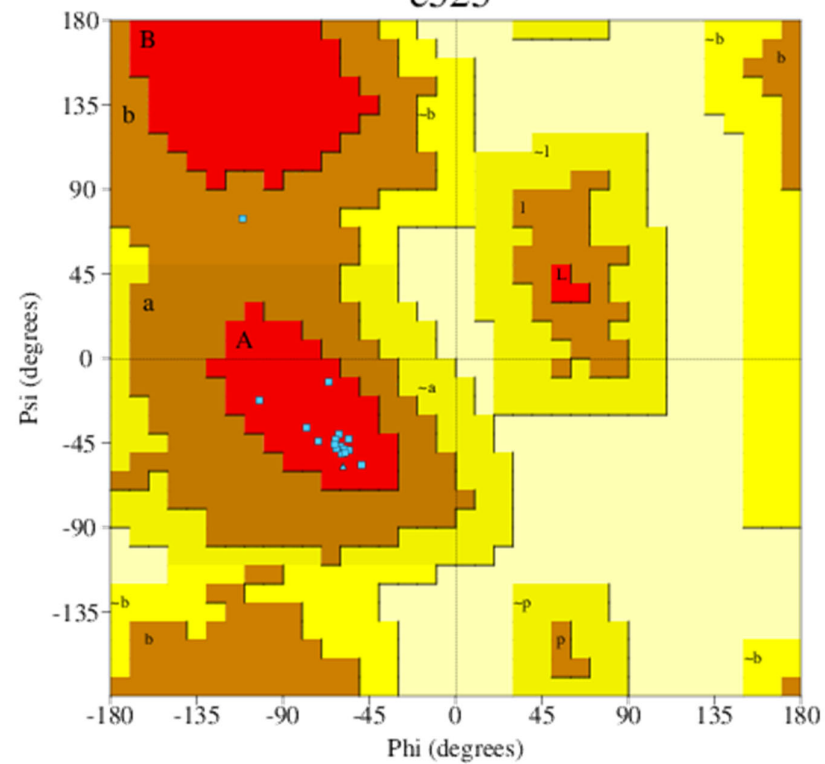

(C)

e523

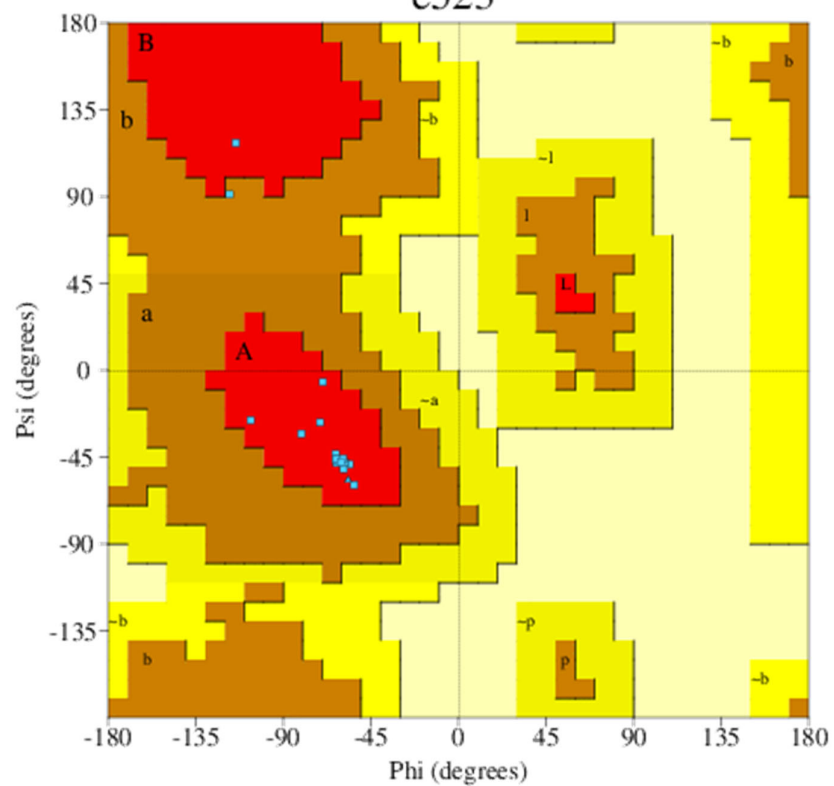

(D)

e524

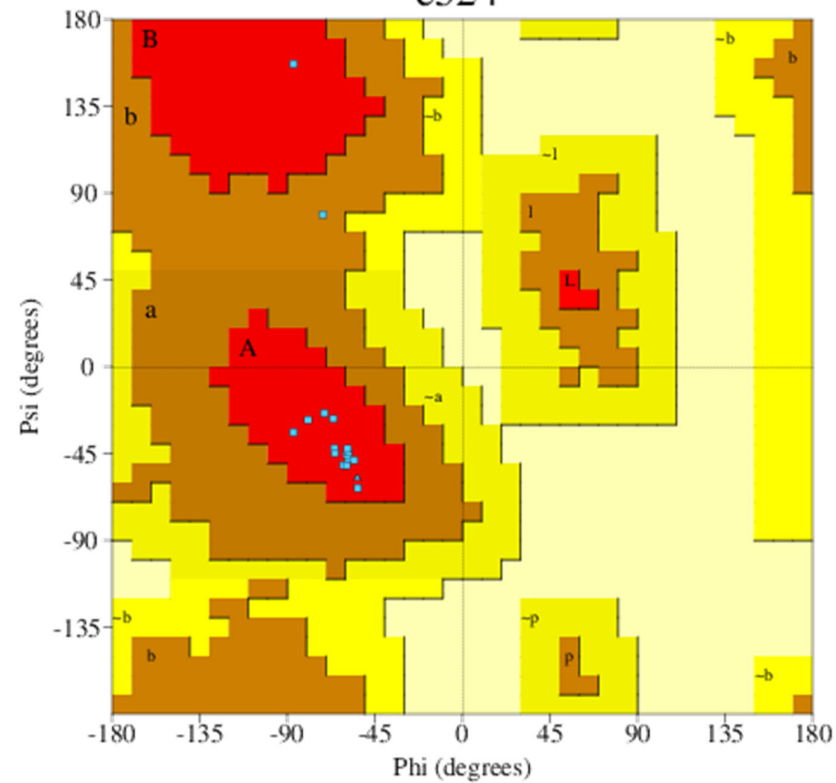

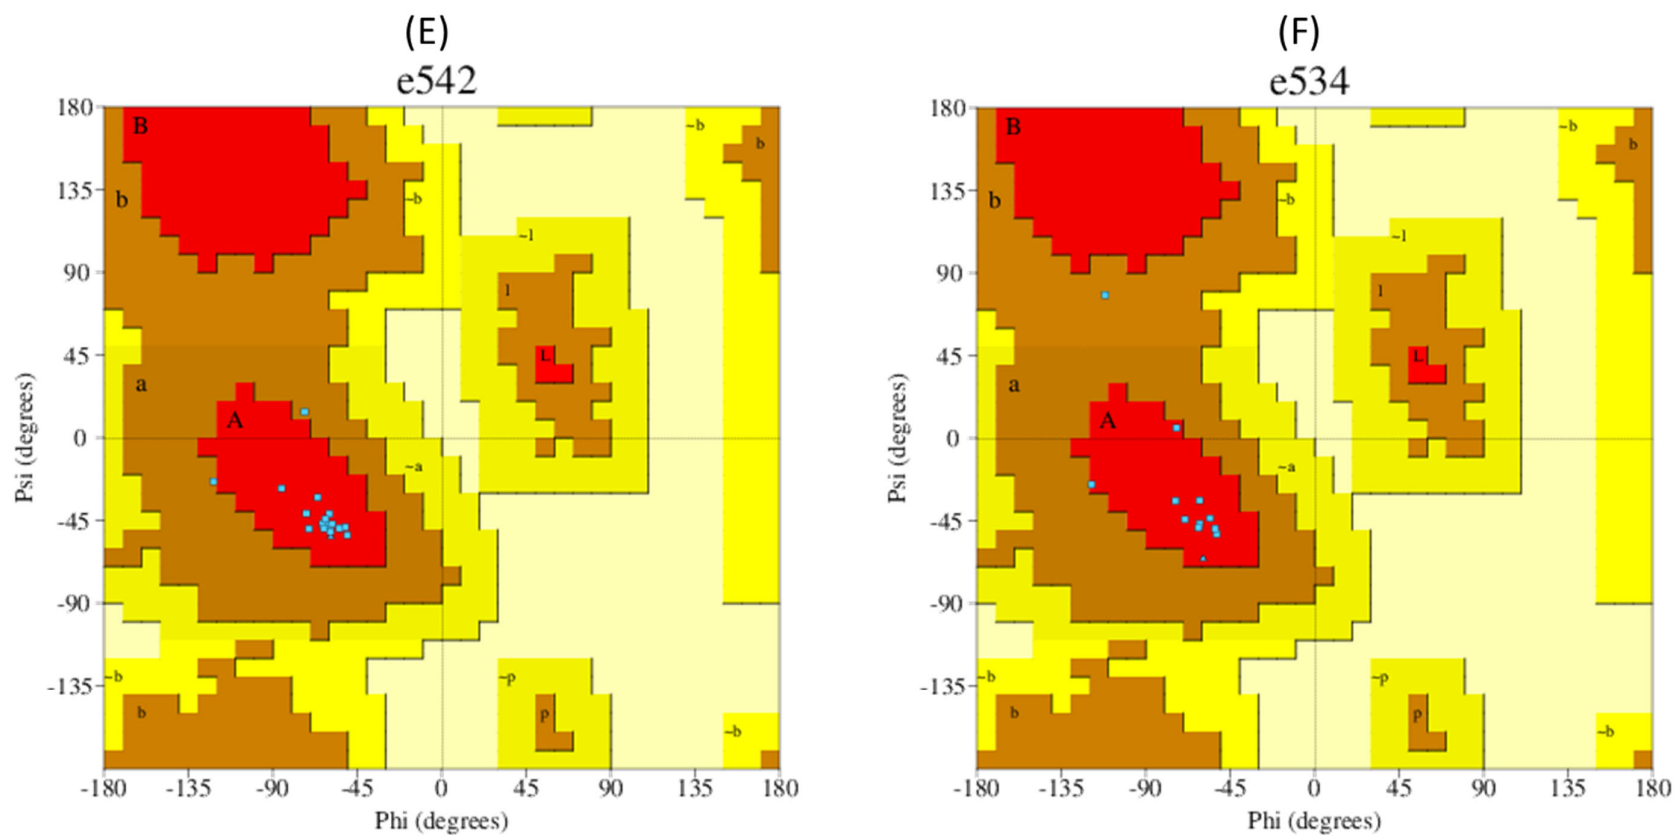

**Figure S3.** The Ramachandran plots of (A) Brevinin-2GUb, (B) tB2U, (C) tB2U- $\alpha$ , (D) tB2U-K, (E) tB2U-6K and (F) 14-tB2U-K predicted by PROCHECK (<https://www.ebi.ac.uk/thornton-srv/software/PROCHECK/>). The X and Y axis is the torsional angles-Psi ( $\Psi$ ) and Phi ( $\Phi$ ),

respectively. The Glycine residues are separately represented by triangles and the red regions are the core areas which represent the most favourable combinations of phi-psi values.

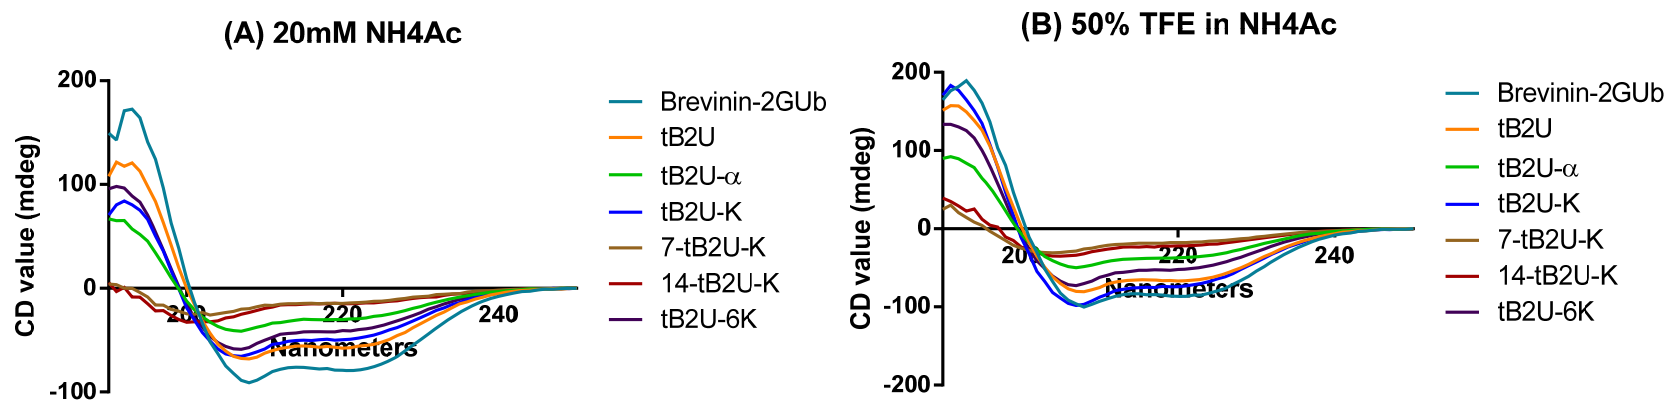

**Figure S4.** The CD spectra of Brevinin-2GUb and its analogues in (A) aqueous solution (20mM NH<sub>4</sub>Ac) and (B) membrane-mimicking solution [50% (v/v) trifluoroethanol (TFE) in NH<sub>4</sub>Ac].

(A1)

References: Micsonai et al. Nucleic Acids Res. 46:W315-22 (2018), Miksonai et al. PNAS 11:E3095-103 (2015)

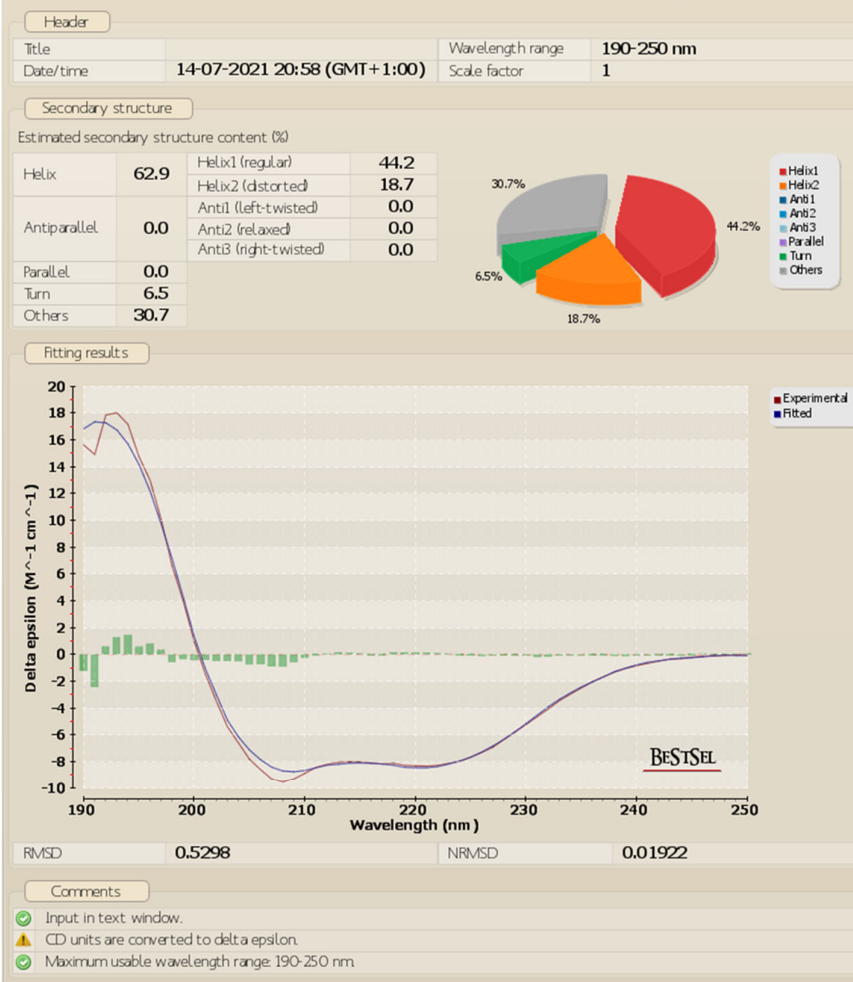

(A2)

References: Micsonai et al. Nucleic Acids Res. 46:W315-22 (2018), Miksonai et al. PNAS 11:E3095-103 (2015)

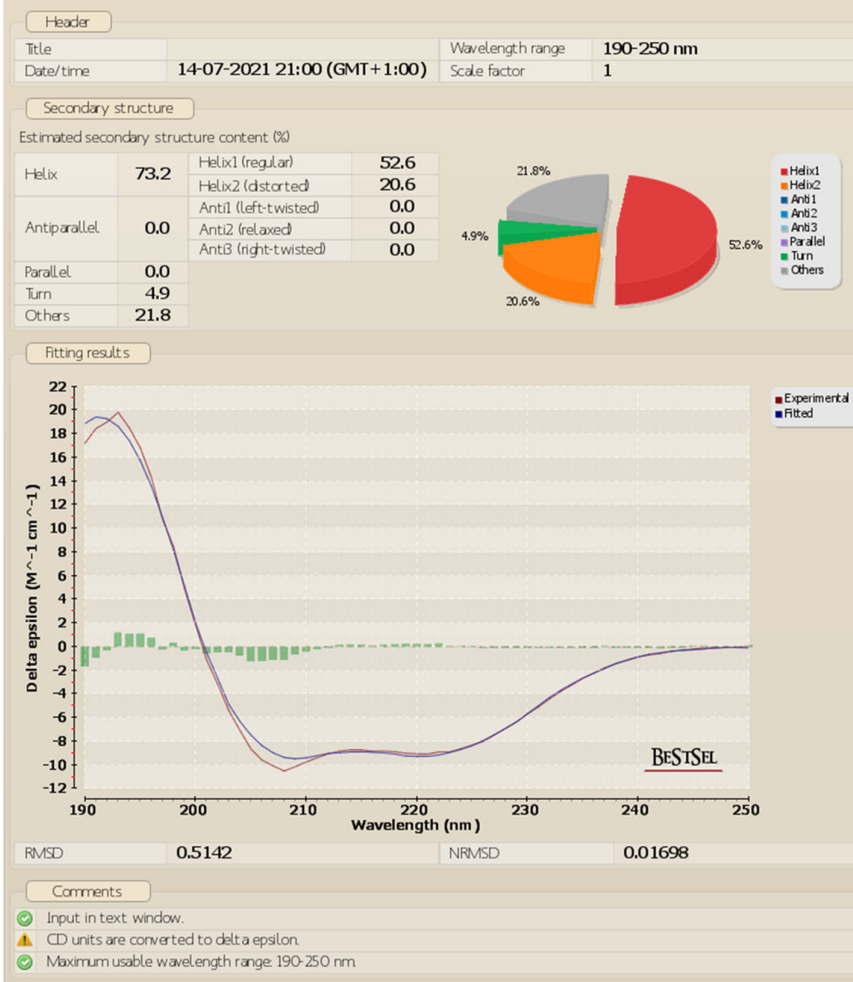



(B1)

References: Micsonai et al. Nucleic Acids Res. 46:W315-22 (2018), Micsonai et al. PNAS 11:E3095-103 (2015)

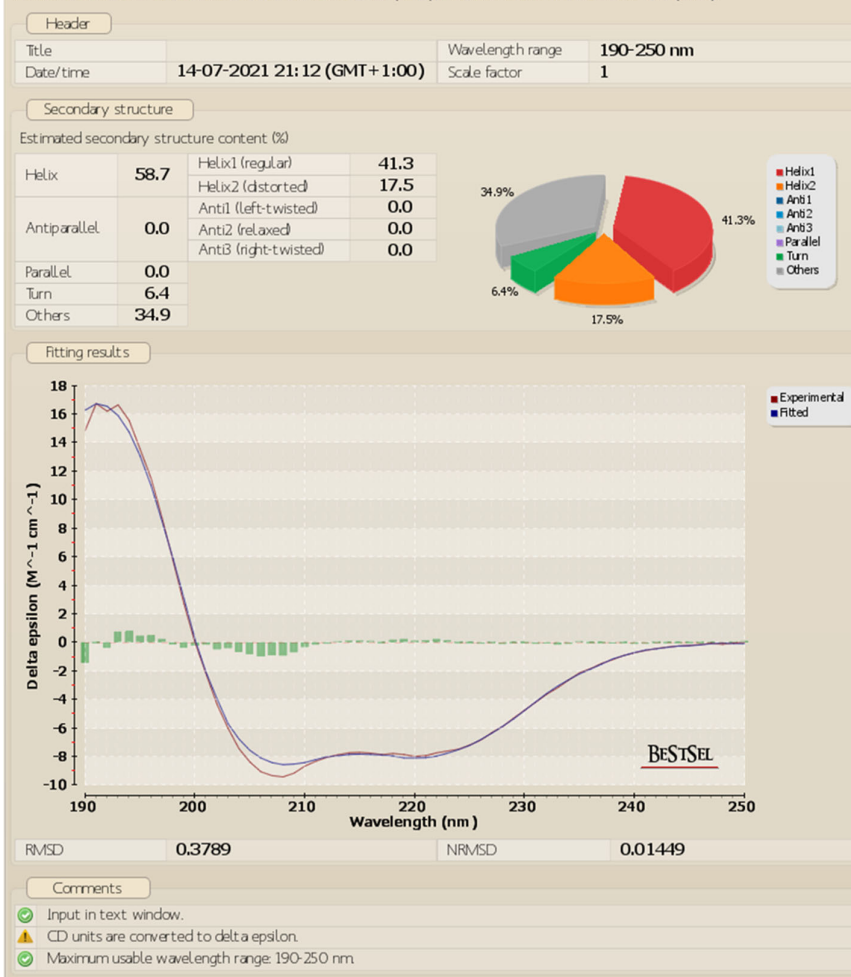

(B2)

References: Micsonai et al. Nucleic Acids Res. 46:W315-22 (2018), Micsonai et al. PNAS 11:E3095-103 (2015)

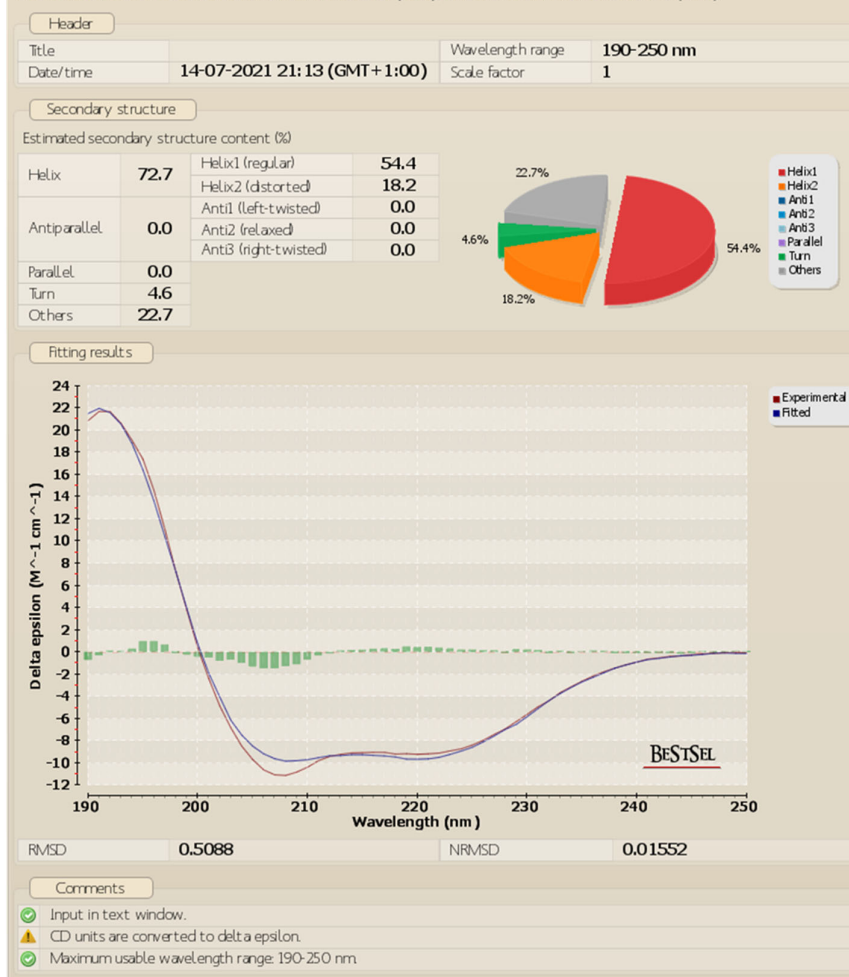

(C1)

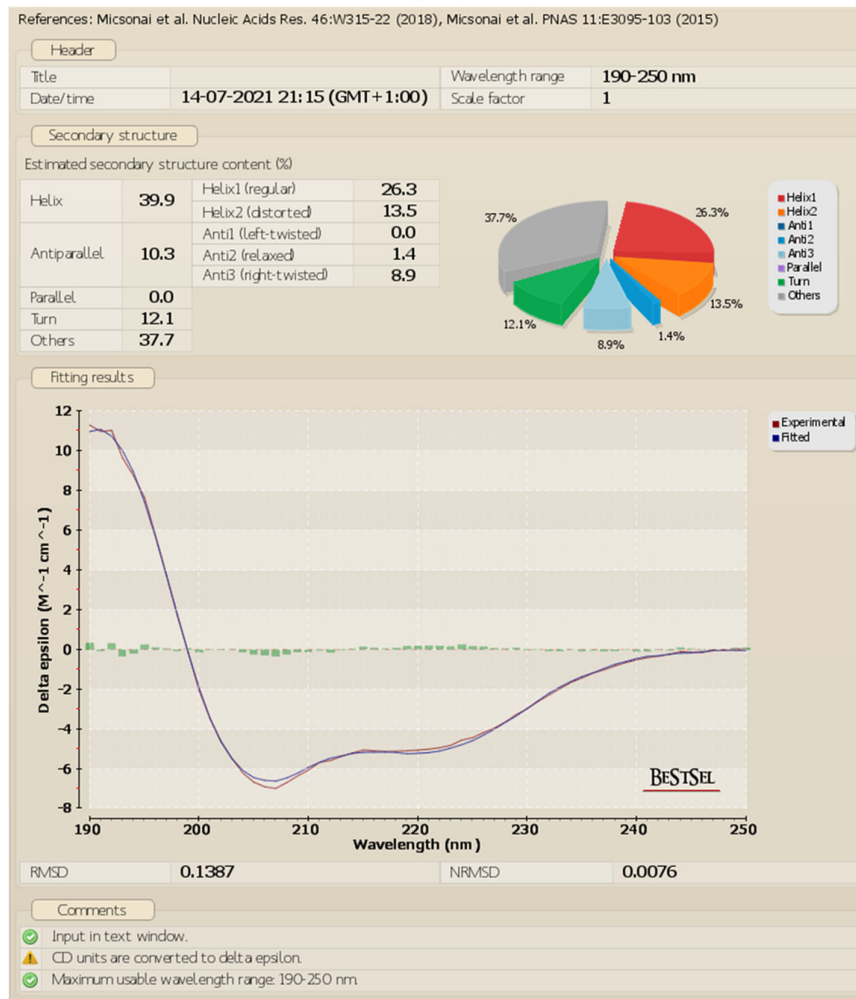

(C2)

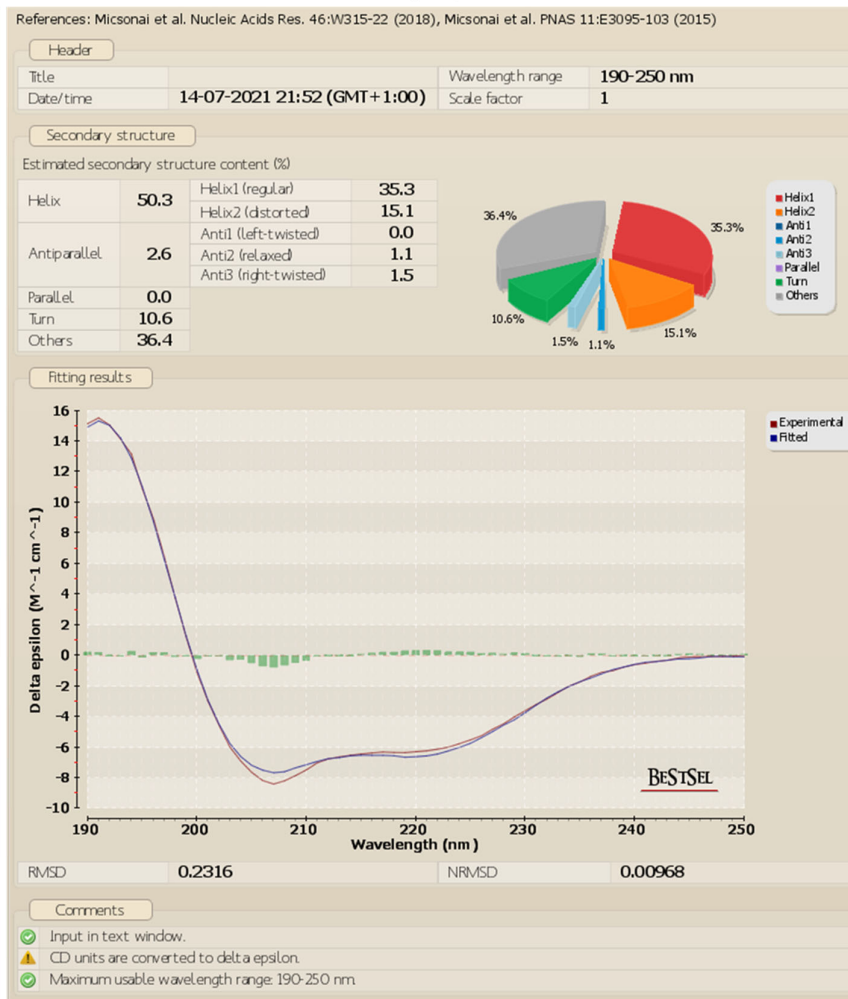

(D1)

References: Micsonai et al. Nucleic Acids Res. 46:W315-22 (2018), Micsonai et al. PNAS 11:E3095-103 (2015)

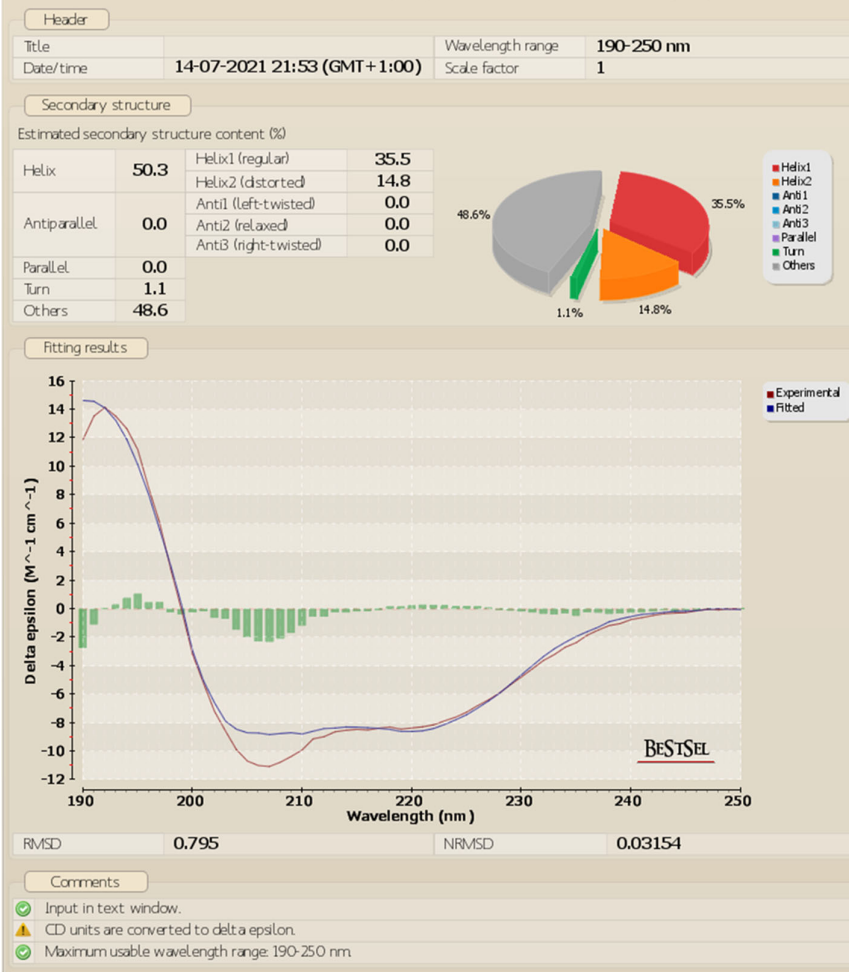

(D2)

References: Micsonai et al. Nucleic Acids Res. 46:W315-22 (2018), Micsonai et al. PNAS 11:E3095-103 (2015)

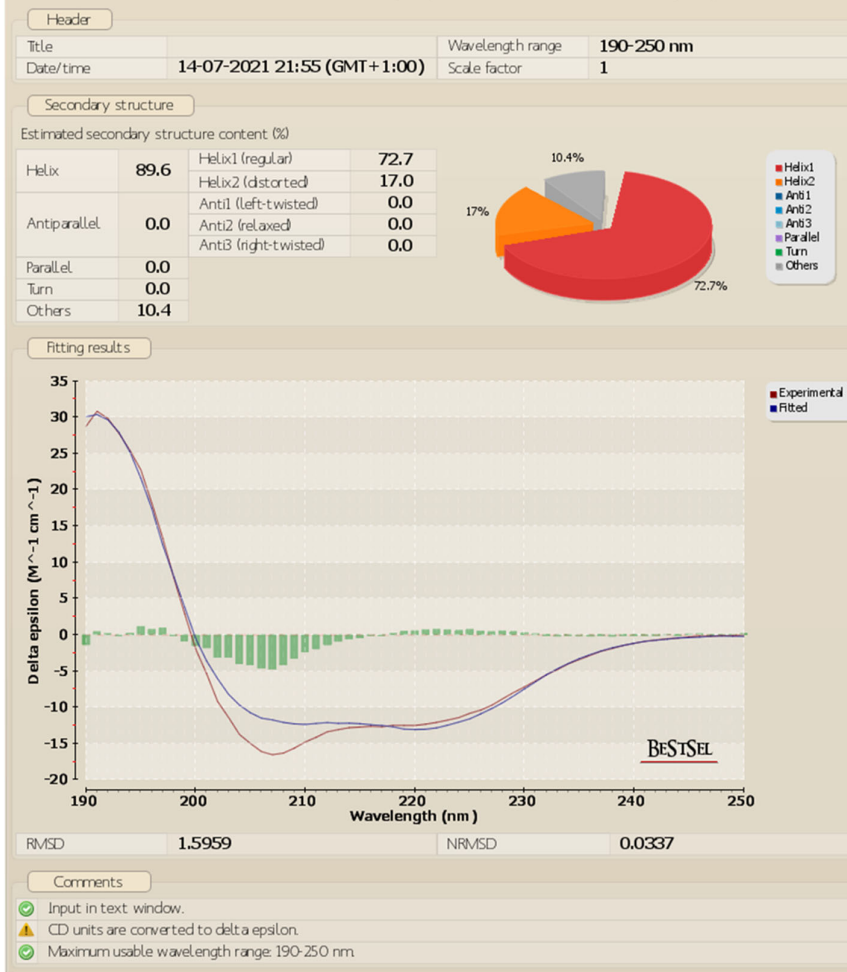

(E1)

References: Micsonai et al. Nucleic Acids Res. 46:W315-22 (2018), Micsonai et al. PNAS 11:E3095-103 (2015)

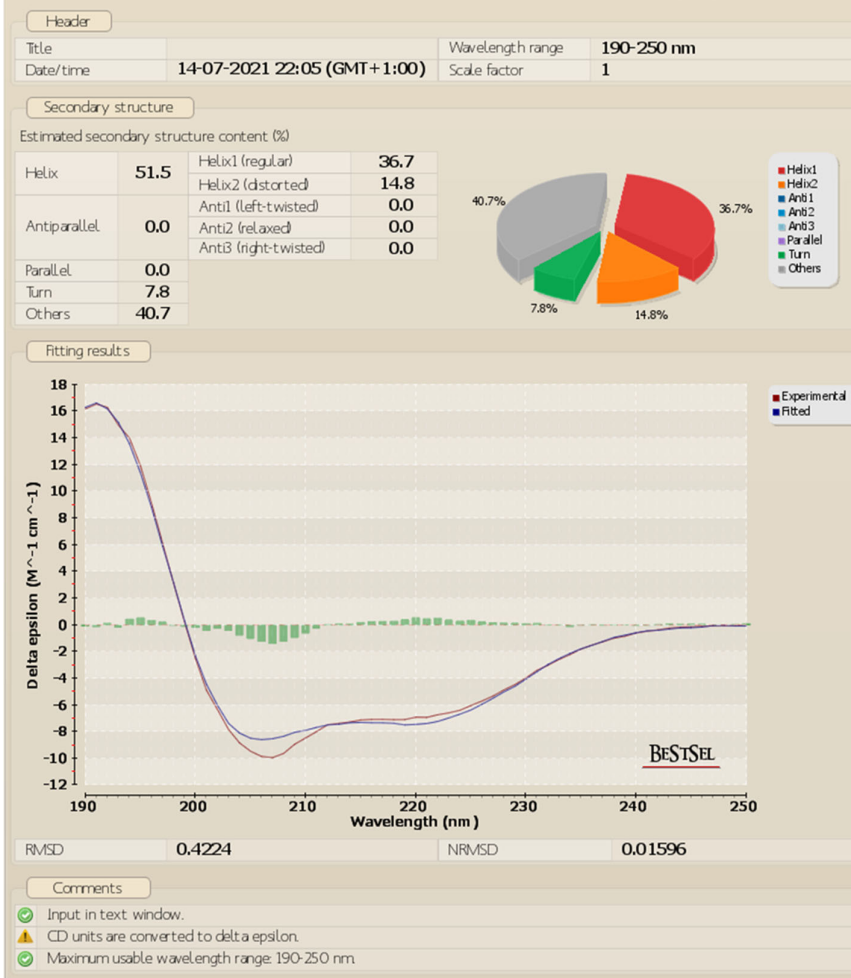

(E2)

References: Micsonai et al. Nucleic Acids Res. 46:W315-22 (2018), Micsonai et al. PNAS 11:E3095-103 (2015)

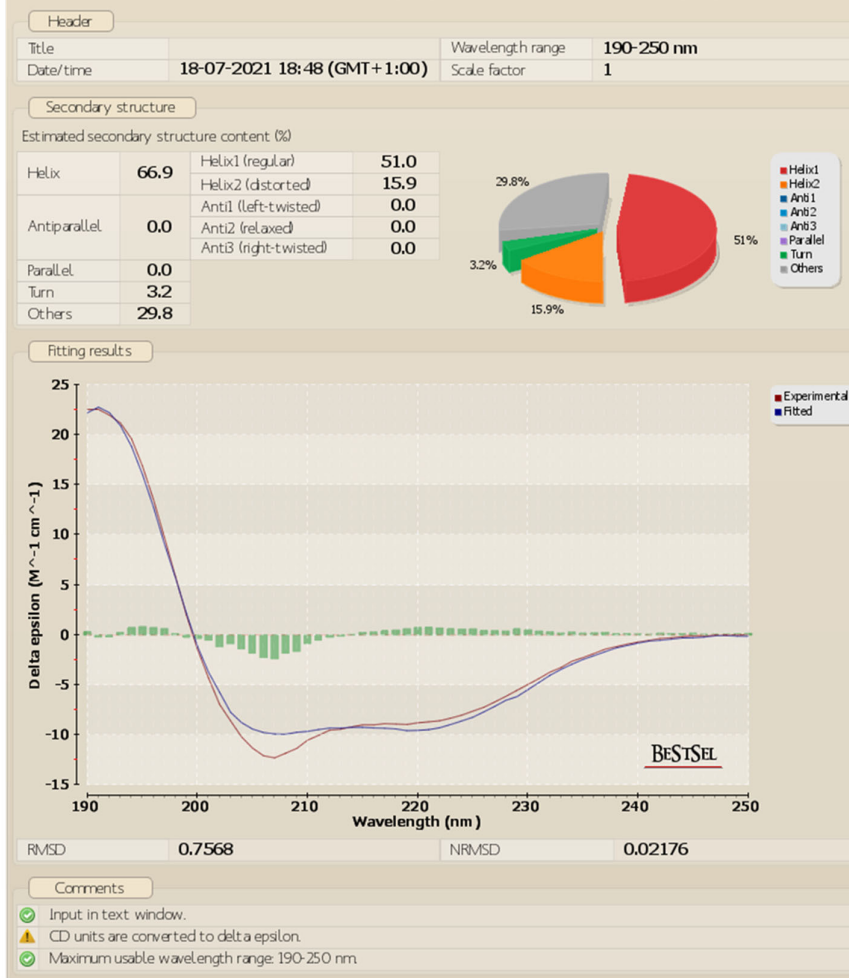



(F1)

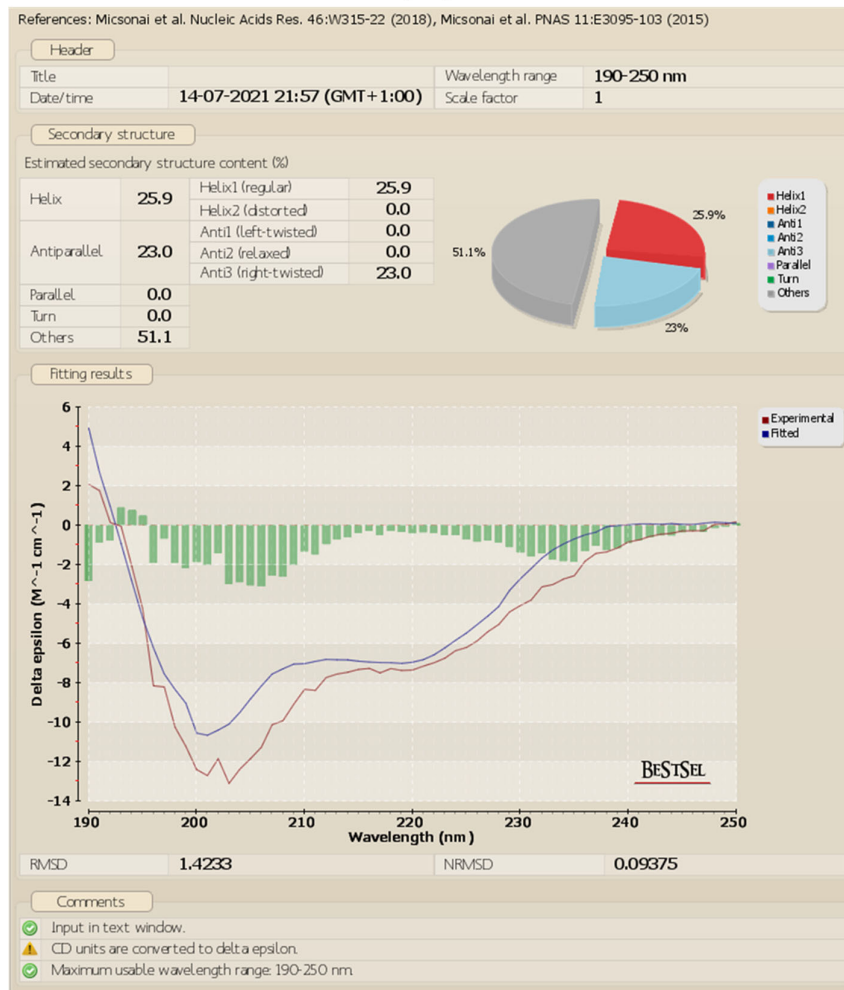

(F2)

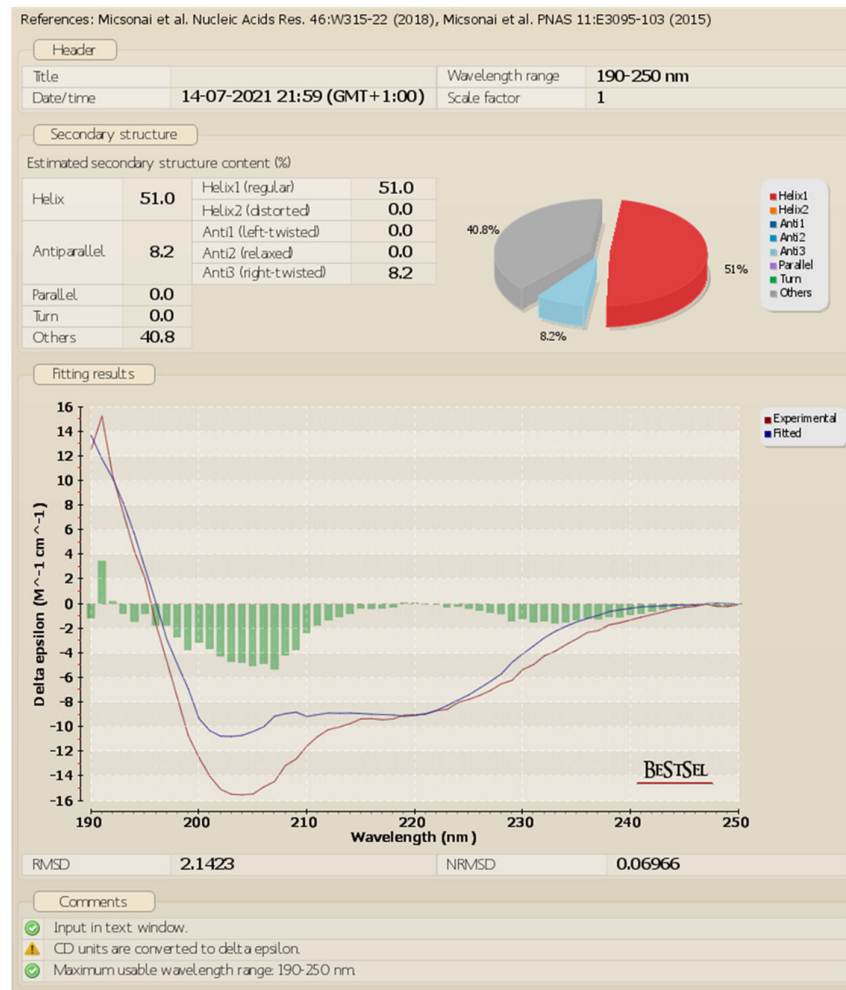

(G1)

References: Micsonai et al. Nucleic Acids Res. 46:W315-22 (2018), Micsonai et al. PNAS 11:E3095-103 (2015)

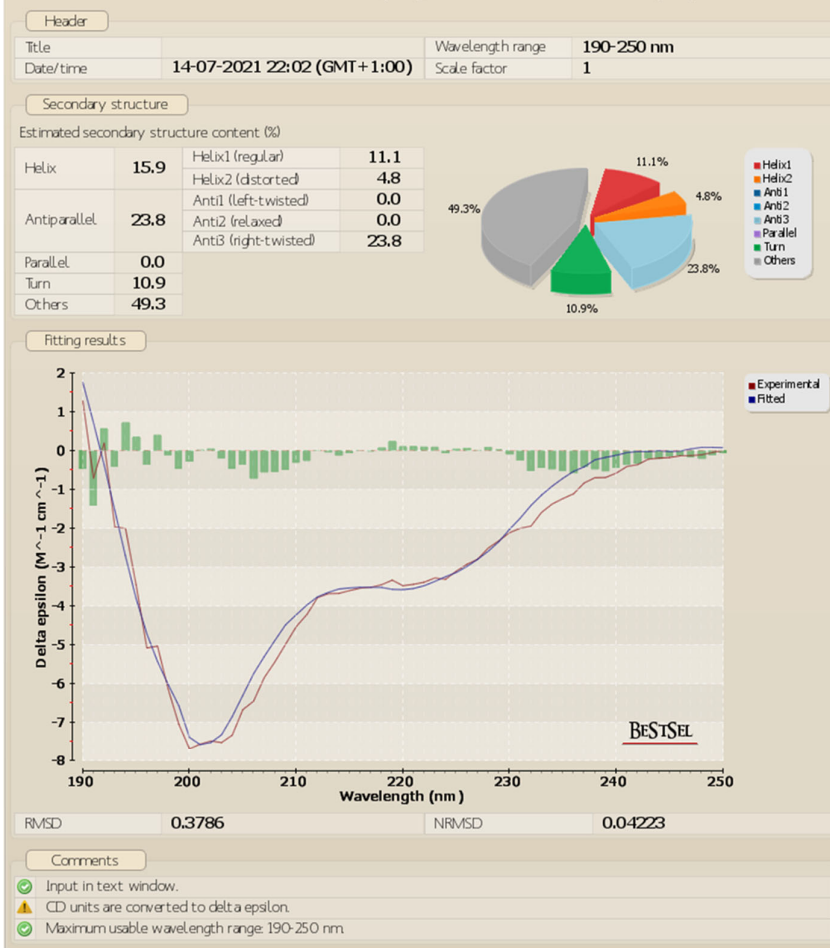

(G2)

References: Micsonai et al. Nucleic Acids Res. 46:W315-22 (2018), Micsonai et al. PNAS 11:E3095-103 (2015)

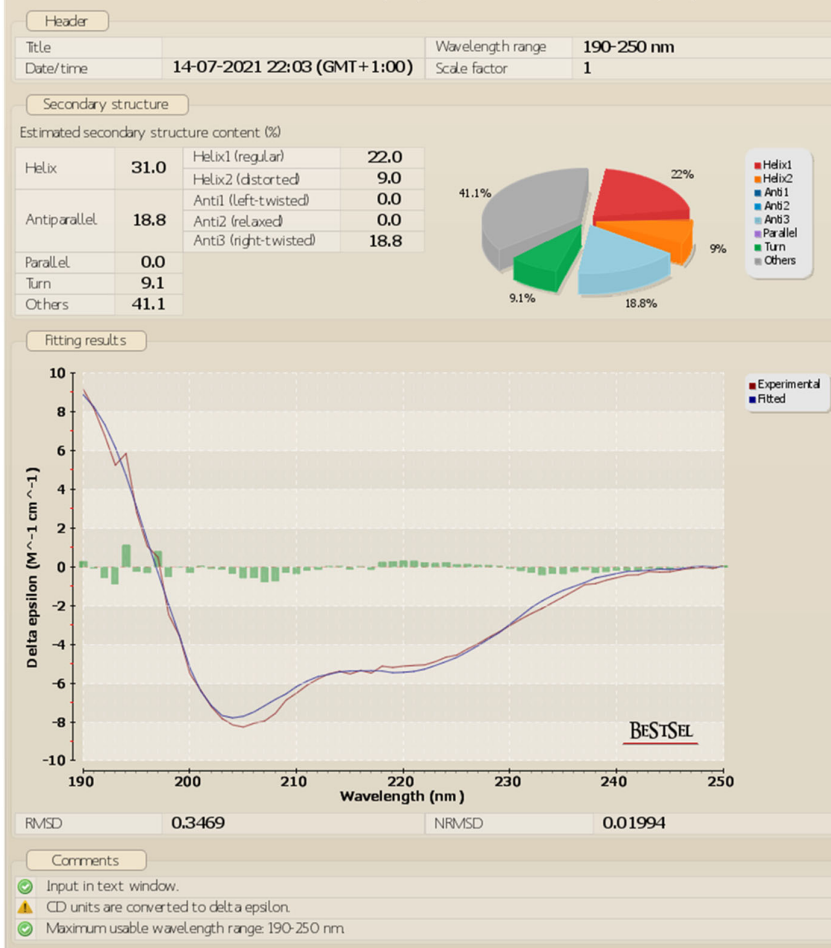

**Figure S5.** The estimated secondary structure contents analysed by Bestsel. The (A1) Brevinin-2GUb, (B1) tB2U, (C1) tB2U- $\alpha$ , (D1) tB2U-K, (E1) tB2U-6K, (F1) 7-tB2U-K and (G1) 14-tB2U-K was in the environment of 20mM NH<sub>4</sub>Ac. The (A2) Brevinin-2GUb, (B2) tB2U, (C2) tB2U- $\alpha$ , (D2) tB2U-K, (E2) tB2U-6K, (F2) 7-tB2U-K and (G2) 14-tB2U-K was in the environment of 50% TFE in 20mM NH<sub>4</sub>Ac.

**Table S1.** Two-way ANOVA analysis of haemolysis activity of Brevinin-2GUb and its analogues. The significance was presented by the symbol \*\*\*\* (P<0.0001).

| Dunnett's multiple comparison test |                   |            |                  |              |
|------------------------------------|-------------------|------------|------------------|--------------|
| Peptide name                       | Groups            | Mean Diff. | 95% CI of diff.  | Significance |
|                                    | N vs. P           | -100.7     | -102.8 to -98.56 | ****         |
| Brevinin-2GUb                      | N vs. 512 $\mu$ M | -21.77     | -24.01 to -19.53 | ****         |
|                                    | N vs. 256 $\mu$ M | -8.063     | -10.30 to -5.825 | ****         |
|                                    | N vs. 128 $\mu$ M | -5.500     | -7.739 to -3.261 | ****         |
| tB2U                               | N vs. 512 $\mu$ M | -3.363     | -5.241 to -1.486 | ****         |
| tB2U- $\alpha$                     | N vs. 512 $\mu$ M | -4.657     | -6.534 to -2.779 | ****         |

|           |                   |        |                  |      |
|-----------|-------------------|--------|------------------|------|
| tB2U-K    | N vs. 512 $\mu$ M | -11.94 | -13.47 to -10.41 | **** |
|           | N vs. 256 $\mu$ M | -7.883 | -9.328 to -6.438 | **** |
|           | N vs. 128 $\mu$ M | -6.718 | -8.163 to -5.273 | **** |
| 7-tB2U-K  | N vs. 512 $\mu$ M | -3.697 | -5.864 to -1.529 | **** |
| 14-tB2U-K | N vs. 512 $\mu$ M | -4.780 | -6.948 to -2.612 | **** |
| tB2U-6K   | N vs. 512 $\mu$ M | -6.963 | -9.202 to -4.725 | **** |
|           | N vs. 256 $\mu$ M | -5.481 | -6.926 to -4.036 | **** |
|           | N vs. 128 $\mu$ M | -4.051 | -5.496 to -2.606 | **** |



**Table S2.** Two-way ANOVA analysis of MTT assay of Brevinin-2GUb and its analogues against HaCaT. The significance was presented by the symbol \*\*\*\* (P<0.0001).

| Dunnett's multiple comparison test |                          |            |                 |              |
|------------------------------------|--------------------------|------------|-----------------|--------------|
| Peptide name                       | Groups                   | Mean Diff. | 95% CI of diff. | Significance |
|                                    | N vs. P                  | 99.69      | 97.42 to 102.0  | ****         |
| Brevinin-2GUb                      | N vs. 10 <sup>-4</sup> M | 54.35      | 52.08 to 56.63  | ****         |

**Table S3.** The survival analysis of the antimicrobial activities in vivo of Brevinin-2GUb and its analogues. The significance was presented by the symbol \* (P<0.05), \*\* (P<0.01), \*\*\* (P<0.001) and \*\*\*\* (P<0.0001).

| Log-rank (Mantel-Cox) Test |         |            |         |                 |
|----------------------------|---------|------------|---------|-----------------|
| Peptide                    | Groups  | Chi Square | P value | P value summary |
|                            | N vs. P | 19.26      | <0.0001 | ****            |

|               |                 |       |         |      |
|---------------|-----------------|-------|---------|------|
| Brevinin-2GUb | N vs. 30 mg/kg  | 15.01 | 0.0001  | ***  |
|               | N vs. 15 mg/kg  | 6.565 | 0.0104  | *    |
|               | N vs. 7.5 mg/kg | 6.350 | 0.0117  | *    |
| tB2U-K        | N vs. 30 mg/kg  | 15.01 | 0.0001  | ***  |
|               | N vs. 15 mg/kg  | 8.308 | 0.0039  | **   |
|               | N vs. 7.5 mg/kg | 5.880 | 0.153   | *    |
| tB2U-6K       | N vs. 30 mg/kg  | 19.26 | <0.0001 | **** |
|               | N vs. 15 mg/kg  | 13.95 | 0.0002  | ***  |
|               | N vs. 7.5 mg/kg | 5.026 | 0.0250  | *    |
